# Supplementary material
Source: HighWire-hosted journal article supplement (https://bmjopen.bmj.com/content/7/1/e013688)
Supplement: inline-supplementary-material-2 [file inline-supplementary-material-2.pdf]

## Data Supplement S2

### MEDLINE Search strategy

1. exp Soft Tissue Infections/
2. exp cellulitis/ or exp skin diseases/
3. soft tissue\*.mp. [mp=title, original title, abstract, mesh headings, heading words, keyword]
4. (skin adj4 infection\*).mp. [mp=title, original title, abstract, mesh headings, heading words, keyword]
5. exp Suppuration/
6. abscess\*.mp. [mp=title, original title, abstract, mesh headings, heading words, keyword]
7. suppurat\*.mp. [mp=title, original title, abstract, mesh headings, heading words, keyword]
8. cutaneous.mp. [mp=title, original title, abstract, mesh headings, heading words, keyword]
9. or/1-8
10. exp Ultrasonography/
11. ultrasound.mp. [mp=title, original title, abstract, mesh headings, heading words, keyword]
12. us.fs.
13. 10 or 11 or 12
14. 9 and 13
15. exp Emergency Medicine/
16. exp Emergency Service, Hospital/
17. emergenc\*.mp. [mp=title, original title, abstract, mesh headings, heading words, keyword]
18. 15 or 16 or 17
19. 14 and 18
20. 5 or 6 or 7
21. 1 or 2 or 3 or 4 or 8
22. 13 and 20 and 21
23. 22 not 19.mp. [mp=title, original title, abstract, mesh headings, heading words, keyword]
24. 22 not 19
25. 9 and 13
26. 25 and 20
27. 19 or 24

### EMBASE

1. exp Soft Tissue Infections/
2. exp cellulitis/ or exp skin diseases/
3. soft tissue\*.mp. [mp=title, abstract, original title, name of substance word, subject heading word, keyword heading word, protocol supplementary concept word, rare disease supplementary concept word, unique identifier]
4. (skin adj4 infection\*).mp. [mp=title, abstract, original title, name of substance word, subject heading word, keyword heading word, protocol supplementary concept word, rare disease supplementary concept word, unique identifier]
5. exp Suppuration/
6. abscess\*.mp. [mp=title, abstract, original title, name of substance word, subject heading word, keyword heading word, protocol supplementary concept word, rare disease supplementary concept word, unique identifier]
7. suppurat\*.mp. [mp=title, abstract, original title, name of substance word, subject heading word, keyword heading word, protocol supplementary concept word, rare disease supplementary concept word, unique identifier]

8. cutaneous.mp. [mp=title, abstract, original title, name of substance word, subject heading word, keyword heading word, protocol supplementary concept word, rare disease supplementary concept word, unique identifier]
9. or/1-8
10. exp Ultrasonography/
11. ultrasound.mp. [mp=title, abstract, original title, name of substance word, subject heading word, keyword heading word, protocol supplementary concept word, rare disease supplementary concept word, unique identifier]
12. us.fs.
13. 10 or 11 or 12
14. 9 and 13
15. exp Emergency Medicine/
16. exp Emergency Service, Hospital/
17. emergenc\*.mp. [mp=title, abstract, original title, name of substance word, subject heading word, keyword heading word, protocol supplementary concept word, rare disease supplementary concept word, unique identifier]
18. 15 or 16 or 17
19. 14 and 18
20. 5 or 6 or 7
21. 1 or 2 or 3 or 4 or 8
22. 13 and 20 and 21

cochrane Jan 19 2015  
 cochrane Jan 28\_ 2015

1. exp Soft Tissue Infections/
2. exp Cellulitis/
3. exp Suppuration/
4. exp Abscess/
5. exp Ultrasonography/
6. 1 or 2 or 3 or 4
7. 5 and 6
8. ultrason\*.mp. [mp=title, original title, abstract, mesh headings, heading words, keyword]
9. absce\*.mp. [mp=title, original title, abstract, mesh headings, heading words, keyword]
10. suppurat\*.mp. [mp=title, original title, abstract, mesh headings, heading words, keyword]
11. 1 or 2 or 3 or 4 or 9 or 10
12. 5 or 8
13. 11 and 12

Web of Science

392

#8 AND #7

Indexes=SCI-EXPANDED, SSCI, A&HCI, CPCI-S, CPCI-SSH Timespan=All years

Edit

Select to combine sets.

Select to delete this set.

# 8

102,002

#6 OR #5

Indexes=SCI-EXPANDED, SSCI, A&HCI, CPCI-S, CPCI-SSH Timespan=All years

Edit

Select to combine sets.

Select to delete this set.

# 7

28,958

#4 OR #3 OR #2 OR #1

Indexes=SCI-EXPANDED, SSCI, A&HCI, CPCI-S, CPCI-SSH Timespan=All years

Edit

Select to combine sets.

Select to delete this set.

# 6

16,652

TI=ultrasonography

Indexes=SCI-EXPANDED, SSCI, A&HCI, CPCI-S, CPCI-SSH Timespan=All years

Edit

Select to combine sets.

Select to delete this set.

# 5

85,481

TI=ultrasound

Indexes=SCI-EXPANDED, SSCI, A&HCI, CPCI-S, CPCI-SSH Timespan=All years

Edit

Select to combine sets.

Select to delete this set.

# 4

3,930

TI=suppurat\*

Indexes=SCI-EXPANDED, SSCI, A&HCI, CPCI-S, CPCI-SSH Timespan=All years

Edit

Select to combine sets.

Select to delete this set.

# 3

21,490

TI=abscess

Indexes=SCI-EXPANDED, SSCI, A&HCI, CPCI-S, CPCI-SSH Timespan=All years

Edit

Select to combine sets.

Select to delete this set.

# 2

2,230

TI=cellulitis

Indexes=SCI-EXPANDED, SSCI, A&HCI, CPCI-S, CPCI-SSH Timespan=All years

Edit

Select to combine sets.

Select to delete this set.

# 1

1,529

TI=soft tissue infection

Indexes=SCI-EXPANDED, SSCI, A&HCI, CPCI-S, CPCI-SSH Timespan=All years
