# Supplementary material
Source: HighWire-hosted journal article supplement (https://bmjopen.bmj.com/content/7/1/e013688)
Supplement: inline-supplementary-material-3 [file inline-supplementary-material-3.pdf]

**Data supplement S3**

| Category                                        | Data |
|-------------------------------------------------|------|
| Lead author                                     |      |
| Year of publication                             |      |
| Journal of publication                          |      |
| Country of study                                |      |
| Patient population (ED, ICU, etc)               |      |
| Blinding? (and who was blinded?)                |      |
| US machine and probe used?                      |      |
| Ultrasound protocol used (if any)?              |      |
| Gold standard used?                             |      |
| Industry funded?                                |      |
| Time to complete US studies?<br>(mean $\pm$ SD) |      |
| Prospective or retrospective                    |      |
